# Supplementary material for: Musculoskeletal Chronic Graft versus Host Disease—A Rare Complication to Allogeneic Hematopoietic Stem Cell Transplant: A Case-Based Report and Review of the Literature
Source: MDPI journal article supplement (doi:10.3390/curroncol29110663), 2022-11-03
Supplement: s1 [file s1]

# Musculoskeletal Chronic Graft versus Host Disease – A Rare Complication to Allogeneic Hematopoietic Stem Cell Transplant: A Case-Based Report and Review of the Literature

Alexander Dåtland Kvinge <sup>1,†</sup>, Tobias Kvammen <sup>1,†</sup>, Hrvoje Miletic <sup>2,3</sup>, Laurence Albert Bindoff <sup>4,5</sup> and Håkon Reikvam <sup>1,6,\*</sup>

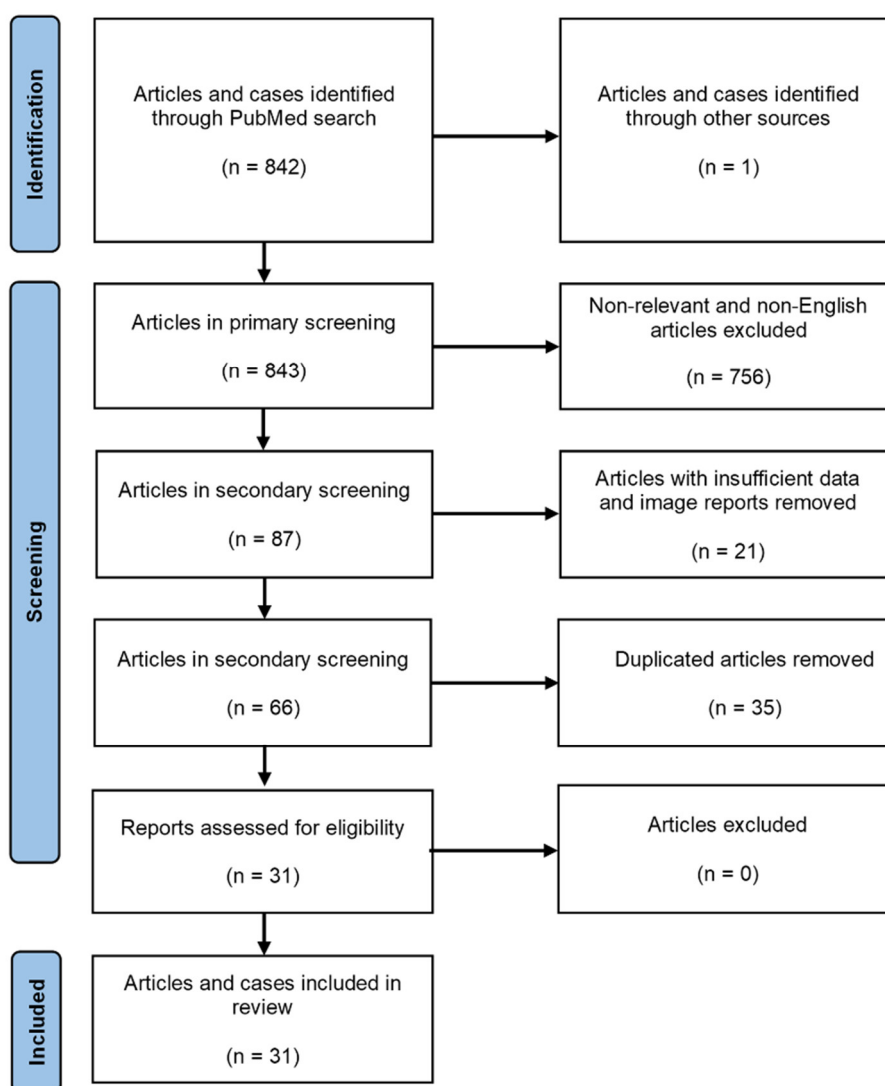

**Figure S1.** Flowchart demonstrating the selection of the articles used for 161 the systemic review.
